# Supplementary material
Source: publisher figshare collection journal article supplement (https://gsajournals.figshare.com/ndownloader/files/13633979)
Supplement: Supplementary file 1 [file 13633979]

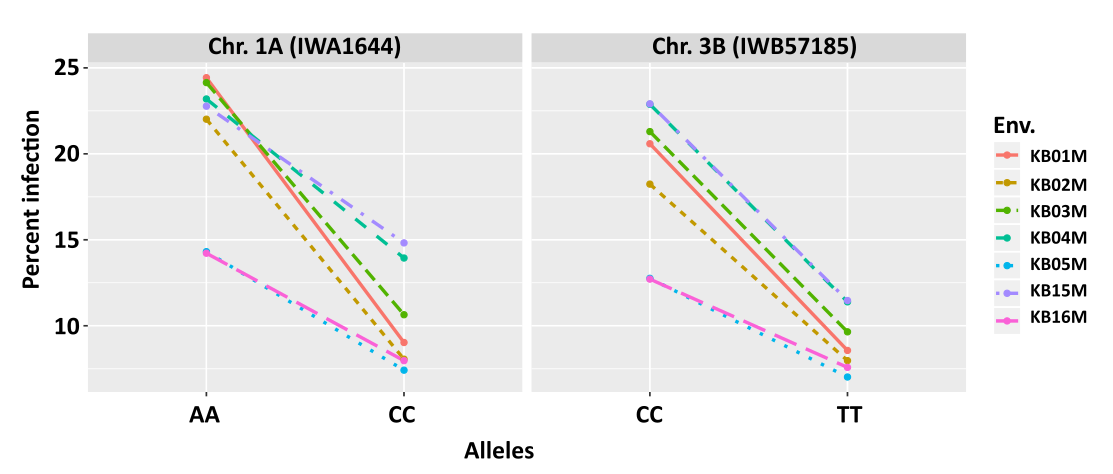


Fig. 2S. Allele effects of two QTL detected for Karnal bunt resistance in the WH542×HD29 population. Allele effects were analysed across seven environments.


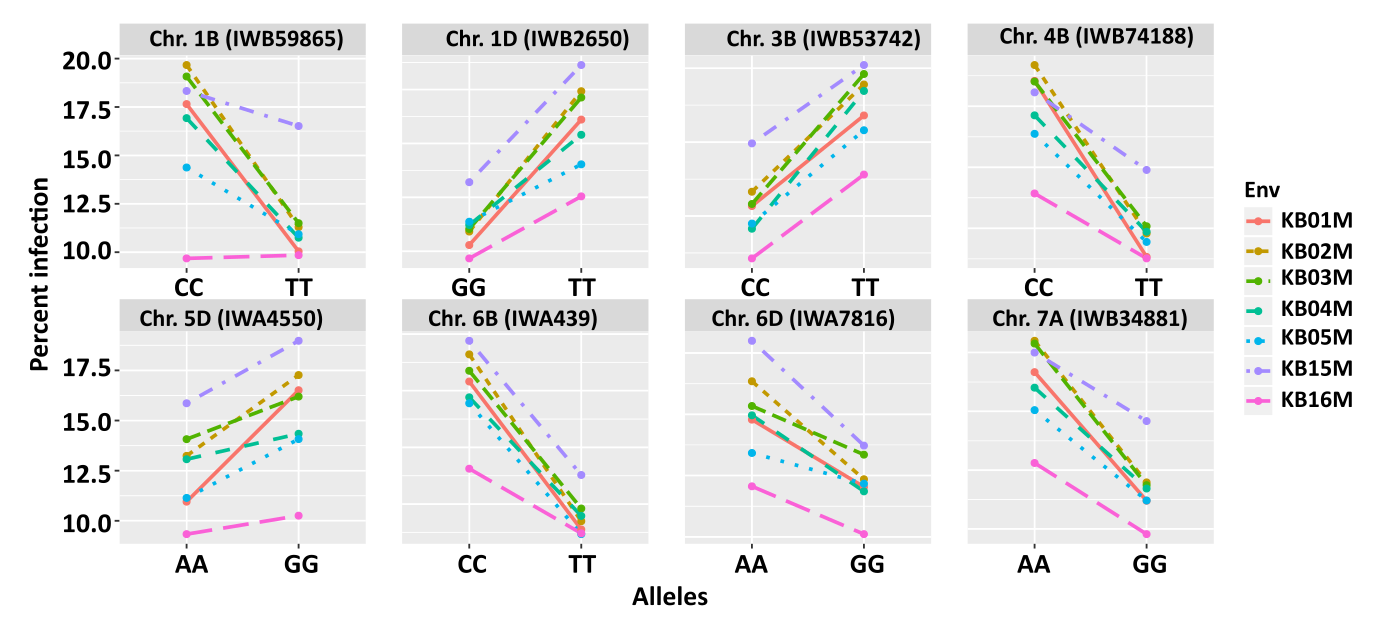


Fig. 3S Allele effects of eight QTL detected for Karnal bunt resistance in the WH542×W485 population. Allele effects were analysed across seven environments.
